# Supplementary material for: Effects of a Mealworm (Tenebrio molitor) Extract on Metabolic Syndrome-Related Pathologies: In Vitro Insulin Sensitivity, Inflammatory Response, Hypolipidemic Activity and Oxidative Stress
Source: MDPI journal article supplement (doi:10.3390/insects13100896), 2022-09-30

Mealworm extract ( $\mu\text{g/ml}$ ): 0 25 50 0 25 50 0 25 50 0 25 50

Insulin (1 nM, min): 0 0 0 2 2 2 5 5 5 10 10 10

pAKT Ser473

AKT

pIR

IR

Vinculin

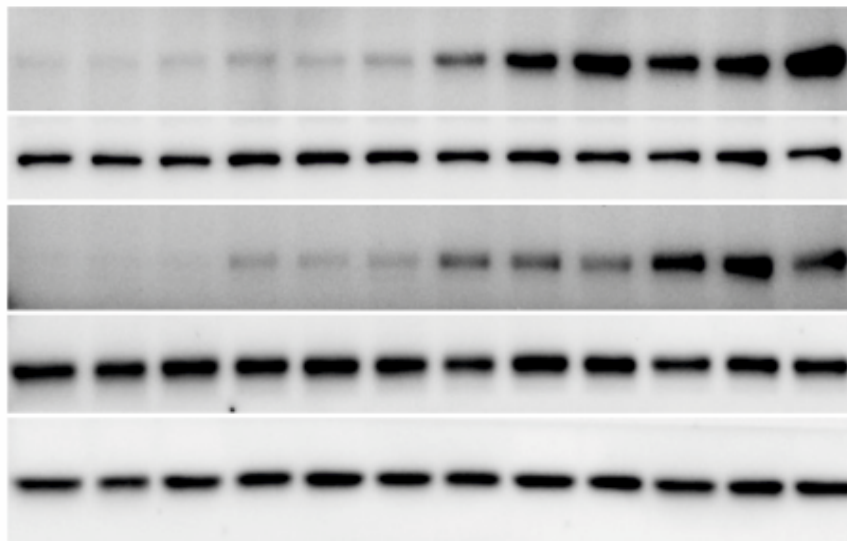

Insulin 1nM

Original

Merge

pIR

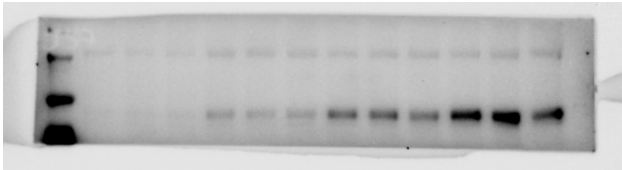

180  
130  
100  
75

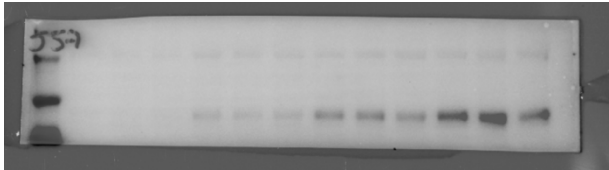

IR

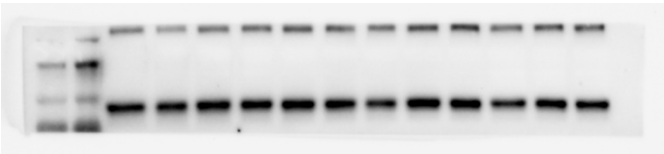

180  
100  
75

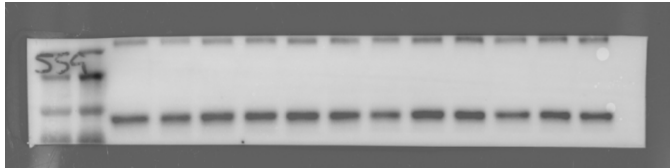

pAKT 473

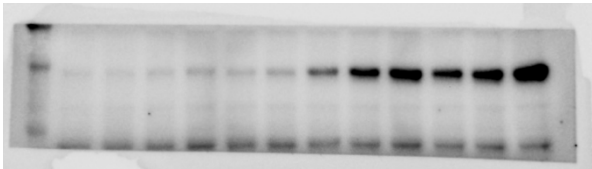

75  
63  
48

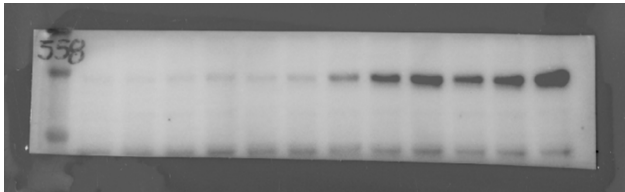

AKT

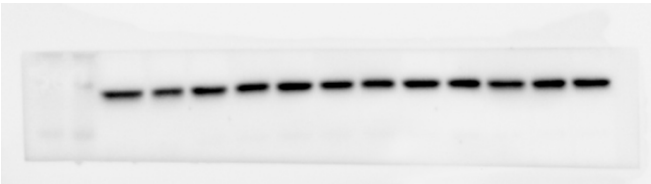

75  
63  
48

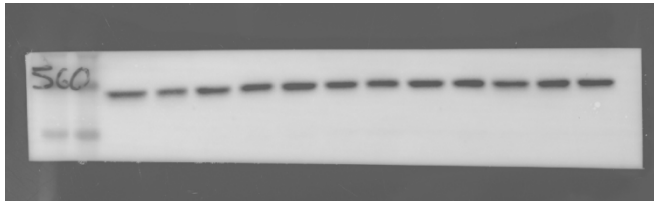

Vinculina

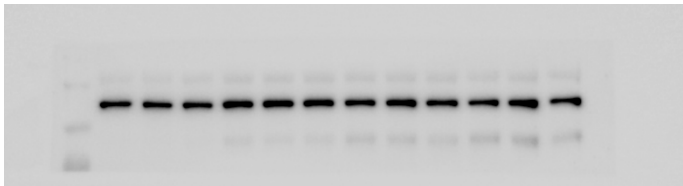

180  
130  
100  
75

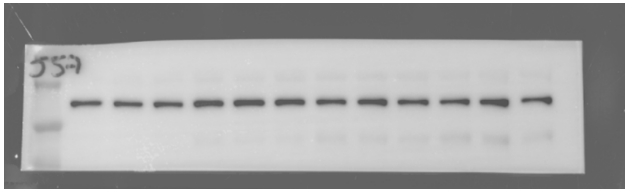

|                                        |   |    |    |   |    |    |   |    |    |    |    |    |
|----------------------------------------|---|----|----|---|----|----|---|----|----|----|----|----|
| Mealworm extract ( $\mu\text{g/ml}$ ): | 0 | 25 | 50 | 0 | 25 | 50 | 0 | 25 | 50 | 0  | 25 | 50 |
| Insulin (5 nM, min):                   | 0 | 0  | 0  | 2 | 2  | 2  | 5 | 5  | 5  | 10 | 10 | 10 |

pAKT Ser473

AKT

pIR

IR

Vinculin

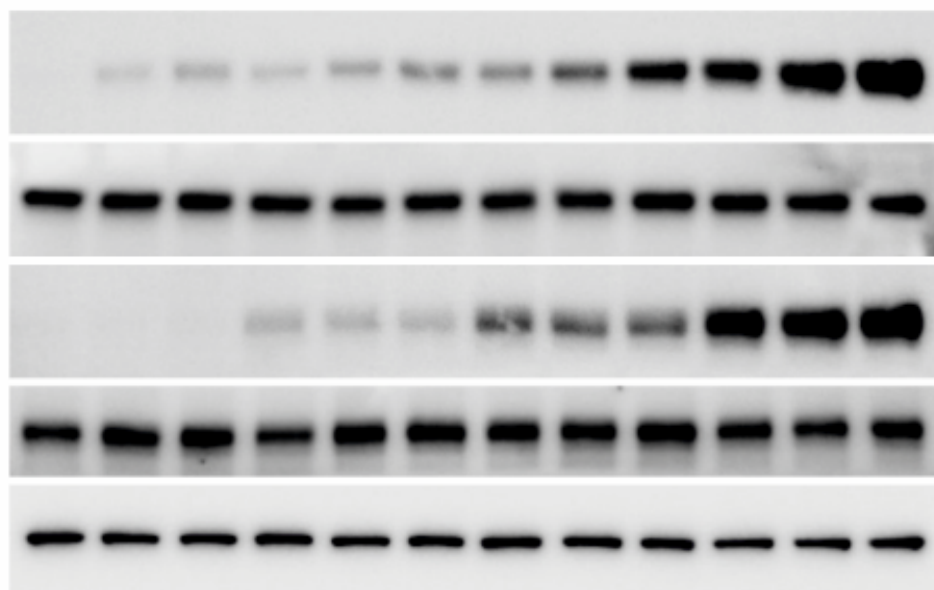

Insulin 5nM

Original

Merge

pIR

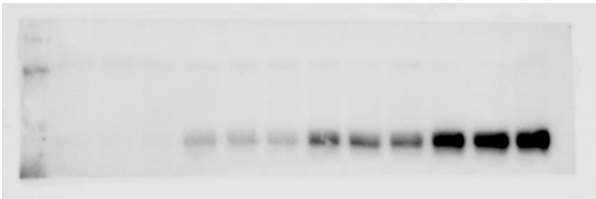

180 —  
130 —  
100 —  
75 —

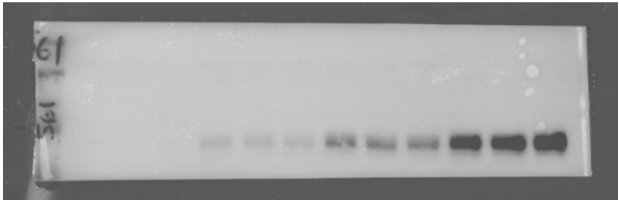

IR

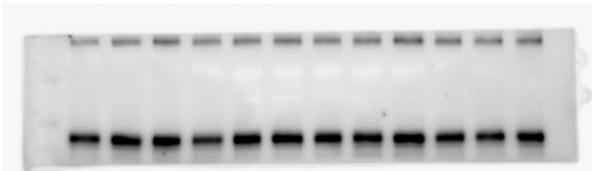

180 —  
130 —  
100 —  
75 —

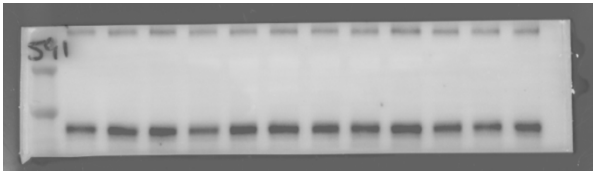

pAKT 473

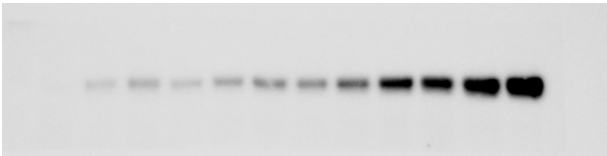

75 —  
63 —  
48 —

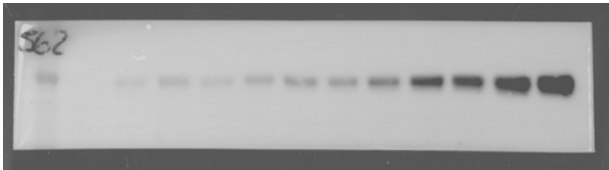

AKT

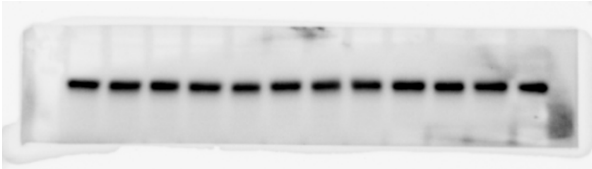

75 —  
63 —  
48 —

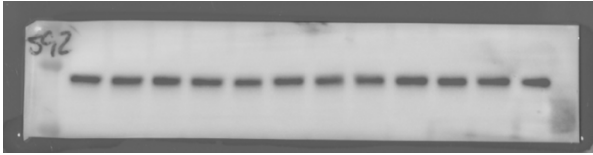

Vinculina

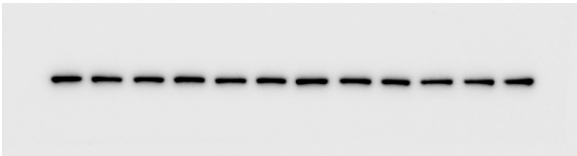

180 —  
130 —  
100 —  
75 —

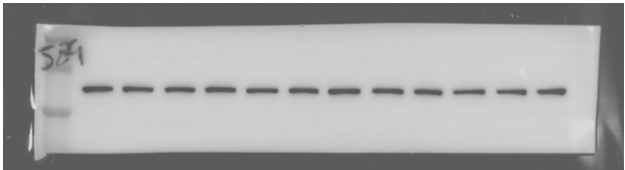

Microglia

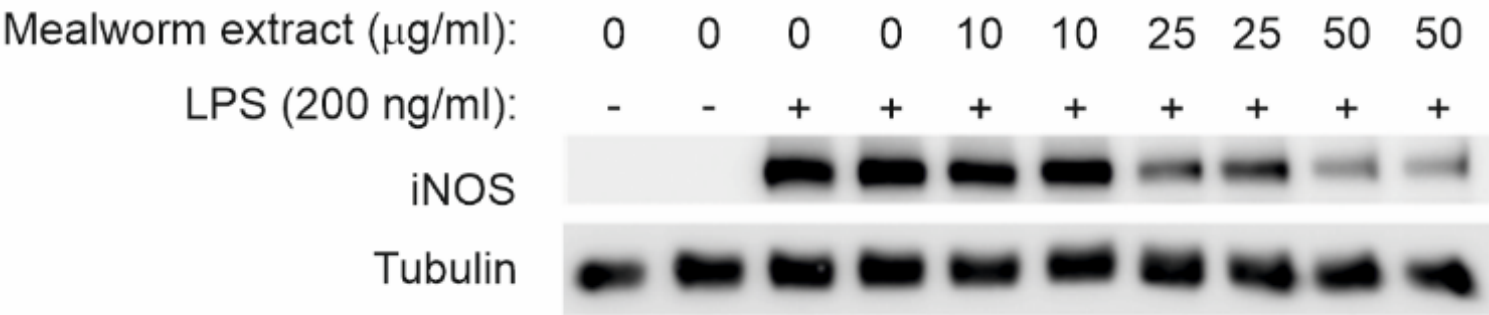

Original

Merge

iNOS

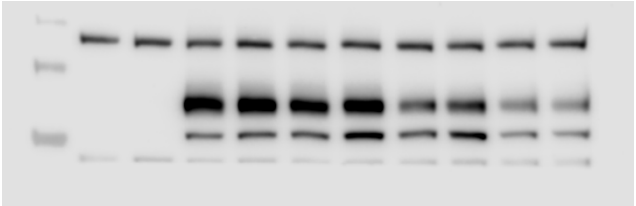

180 —  
130 —  
100 —

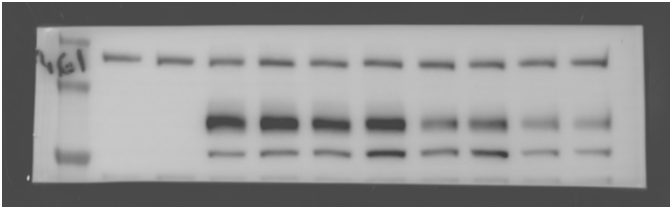

Tubulina

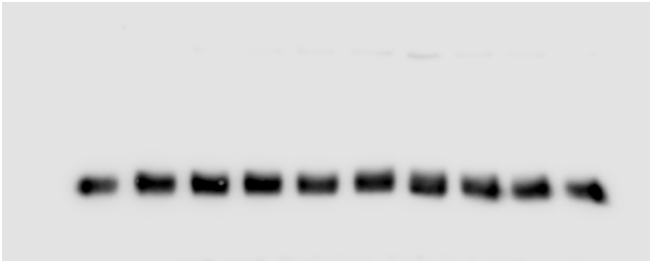

75 —  
63 —  
48 —

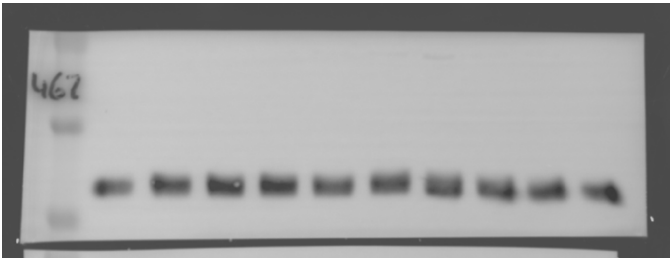

Supplement: s1 [file s1]
